# Supplementary material
Source: PubMed Central journal article supplement (PMC8860878)
Supplement: NIHMS1765740-supplement-1.pdf [file NIHMS1765740-supplement-1.pdf]

## SUPPLEMENTAL INFORMATION

### **Sculpting therapeutic monoclonal antibody *N*-glycans using endoglycosidases**

Beatriz Trastoy,<sup>1,2\*</sup> Jonathan J. Du,<sup>3</sup> Mikel García-Alija,<sup>1,2</sup> Chao Li,<sup>4</sup> Erik H. Klontz,<sup>5,6</sup> Lai-Xi Wang,<sup>4</sup> Eric J. Sundberg,<sup>3\*</sup> and Marcelo E. Guerin<sup>1,2,7\*</sup>

<sup>1</sup> Structural Glicobiology Laboratory, Biocruces Health Research Institute, Barakaldo, Bizkaia, 48903, Spain

<sup>2</sup> Structural Glycobiology Laboratory, Center for Cooperative Research in Biosciences (CIC bioGUNE), Basque Research and Technology Alliance (BRTA), Bizkaia Technology Park, Building 801A, 48160 Derio, Spain,

<sup>3</sup> Department of Biochemistry, Emory University School of Medicine, Atlanta, GA 30322, USA.

<sup>4</sup> Department of Chemistry and Biochemistry, University of Maryland, College Park, MD 20742, USA

<sup>5</sup> Institute of Human Virology, University of Maryland School of Medicine, Baltimore, MD 21201, USA

<sup>6</sup> Department of Microbiology and Immunology, University of Maryland School of Medicine, Baltimore, MD 21201, USA

<sup>7</sup> Ikerbasque, Basque Foundation for Science, 48009 Bilbao, Spain

## **Table of Contents**

Supplementary Figure 1: Structural basis of ENGases specificity for *N*-glycans.

Supplementary Figure 2: Schematic representation of the binding site of GH18 ENGases.

**A**

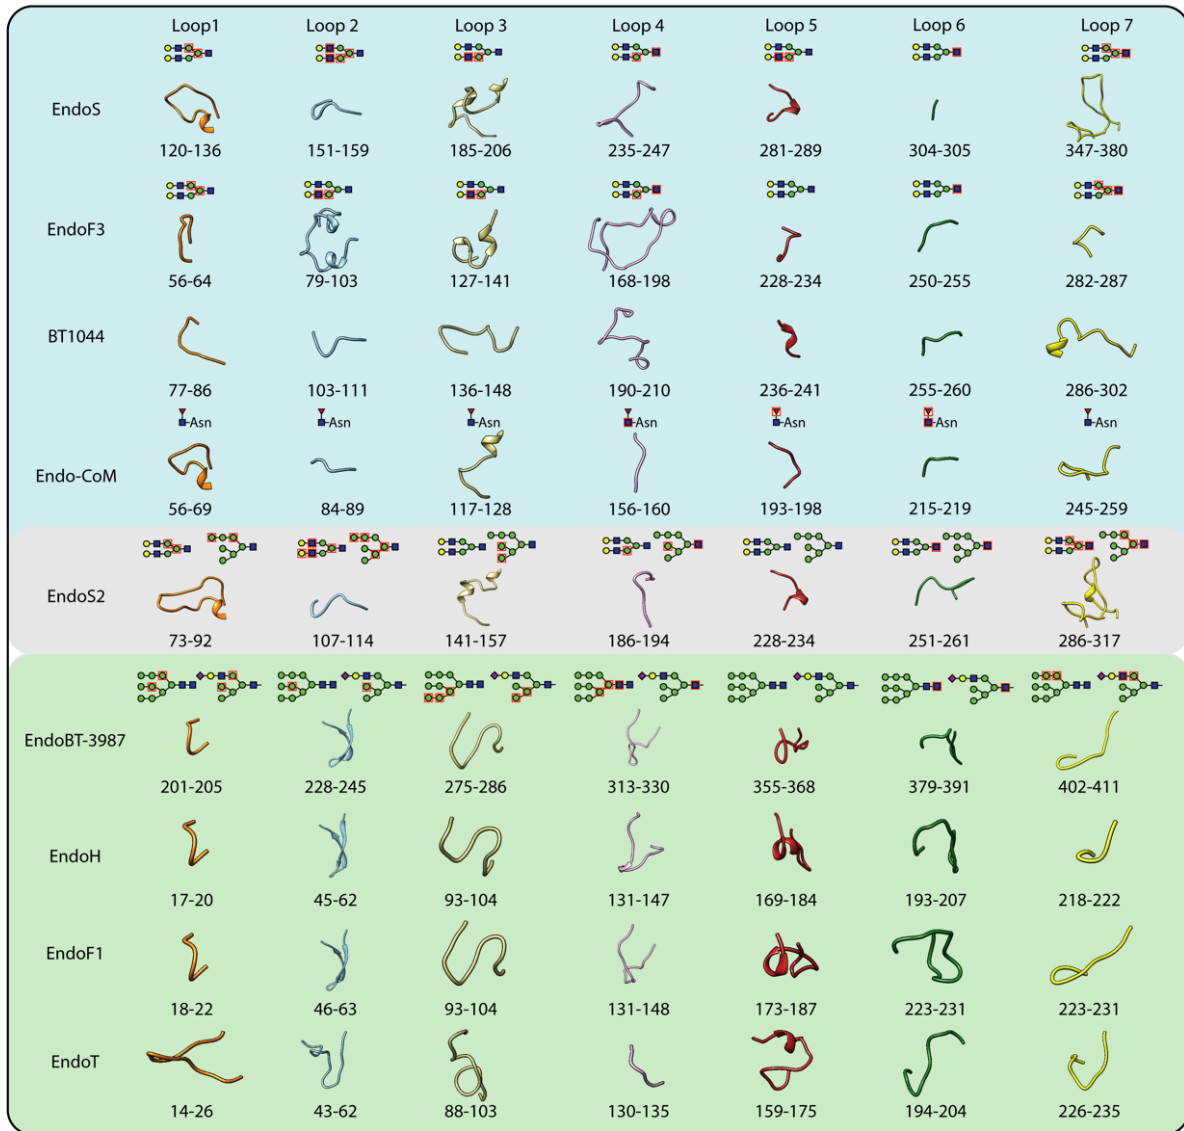

**B**

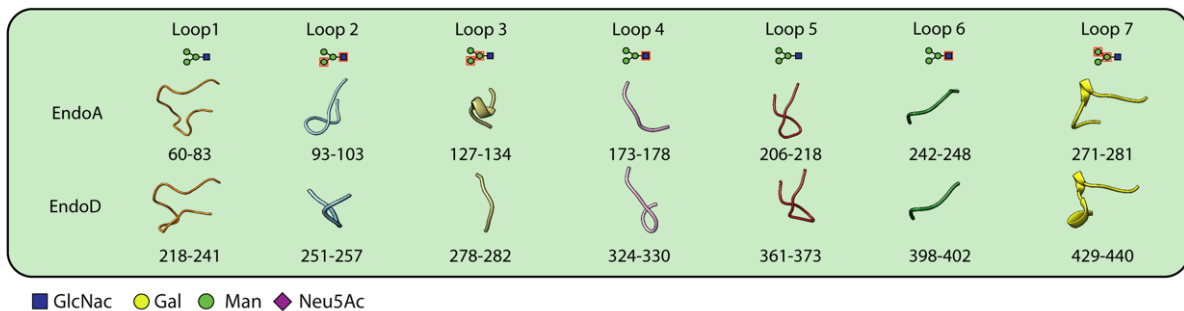

**Supplementary Fig 1 | Structural basis of ENGases specificity for N-glycans.** **A** Structural comparison of the loops surrounding the active site of GH18 family enzymes with ENGase activity and known X-ray crystal structure: EndoS (PDB code 6EN3), EndoF3 (1EOM), BT1044 (PDB code 6Q64), Endo-CoM (6KPN), EndoS2 (PDB codes 6MDS and 6MDV), EndoBT-3987 (PDB codes 6T8K and 7NWF), EndoH (PDB code 1C3F), EndoF1 (PDB code 2EBN) and EndoT (PDB code 4AC1). **B** Structural comparison of the loops surrounding the

active site of GH85 family enzymes with ENGase activity and known X-ray crystal structure: EndoA (PDB code 3FHA) and EndoD (PDB code 2W92). Enzymes that hydrolyze CT- and HM-type *N*-glycans are highlighted in blue and green, respectively and EndoS2 that is able to hydrolyze CT-, HM- and Hy-type *N*-glycans is highlighted in grey. Carbohydrate moieties that interact with each loop in the crystal structures are marked with red squares.

A

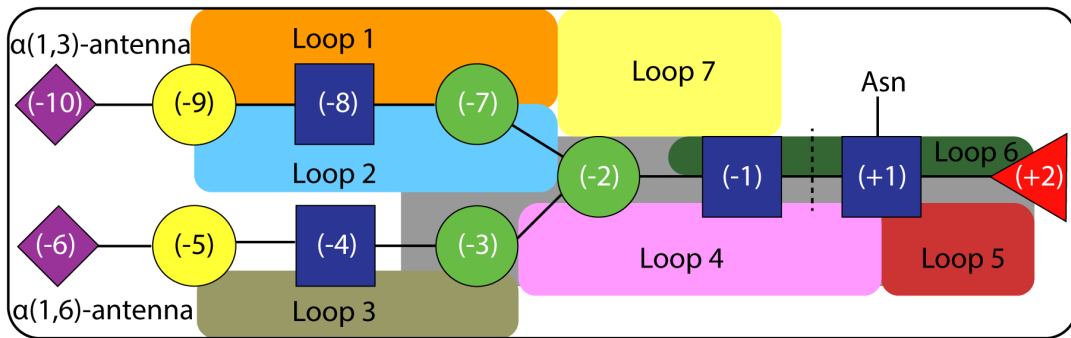

B

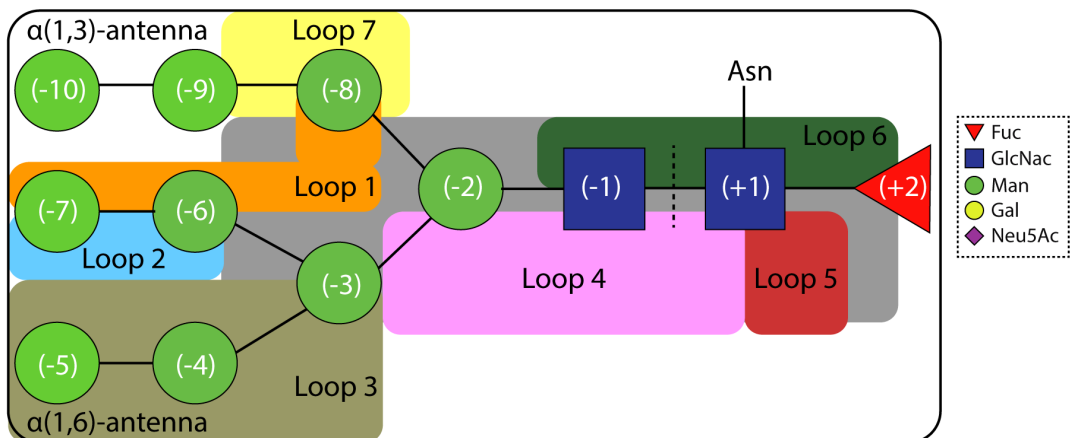

**Supplementary Fig 2** | Schematic representation of the binding site of GH18 ENGases that hydrolyze CT-type (A) and HM-type (B) *N*-glycans. The loops and the  $\beta$ -barrel that interact with the glycan are highlighted in different colors and grey, respectively.
